# Supplementary material
Source: PubMed Central journal article supplement (PMC6334197)
Supplement: ajcd0008-0058-f3.pdf [file ajcd0008-0058-f3.pdf]

## Electrocardiographic subclinical myocardial injury and alcohol consumption

**Table S1.** Multivariable odds ratio and 95% CI of association between alcohol categories and sub-clinical myocardial injury

| Alcohol Categories | Model 1             |         | Model 2             |         | Model 3             |         |
|--------------------|---------------------|---------|---------------------|---------|---------------------|---------|
|                    | Odds Ratio (95% CI) | p-value | Odds Ratio (95% CI) | p-value | Odds Ratio (95% CI) | p-value |
| 0 drinks/week      | <i>Reference</i>    |         | <i>Reference</i>    |         | <i>Reference</i>    |         |
| 1-6 drinks/week    | 0.96 (0.83-1.11)    | 0.73    | 0.98 (0.83-1.15)    | 0.35    | 0.97 (0.82-1.14)    | 0.27    |
| 7-13 drinks/week   | 0.83 (0.65-1.04)    | 0.17    | 0.82 (0.63-1.07)    | 0.37    | 0.79 (0.60-1.04)    | 0.29    |
| ≥14 drinks/week    | 0.99 (0.67-1.47)    | 0.72    | 0.84 (0.54-1.32)    | 0.67    | 0.81 (0.51-1.27)    | 0.59    |

Model 1 adjusted for age, sex, race and socioeconomic status. Model 2 adjusted for model 1 plus smoking and physical activity, BMI. Model 3 adjusted for model 2 hypertension, insulin resistance, HDL, CRP. CRP, C-reactive protein; HDL, high-density lipoprotein; BMI, body mass index. Hypertension defined as systolic blood pressure ≥130 mmHg or diastolic blood pressure ≥85 or taking antihypertensive medications. Insulin resistance defined as fasting blood sugar ≥100 mg/dl, or self-reported history of diabetes or taking medications.
